# Supplementary material for: The NLR-related protein NWD1 is associated with prostate cancer and modulates androgen receptor signaling
Source: PubMed Central journal article supplement (PMC4039239; doi:10.18632/oncotarget.1850), 2014-03-26
Supplement: oncotarget-05-1666-s001.pdf [file oncotarget-05-1666-s001.pdf]

## The NLR-related protein NWD1 is associated with prostate cancer and modulates androgen receptor signaling

### SUPPLEMENTARY FIGURE LEGENDS

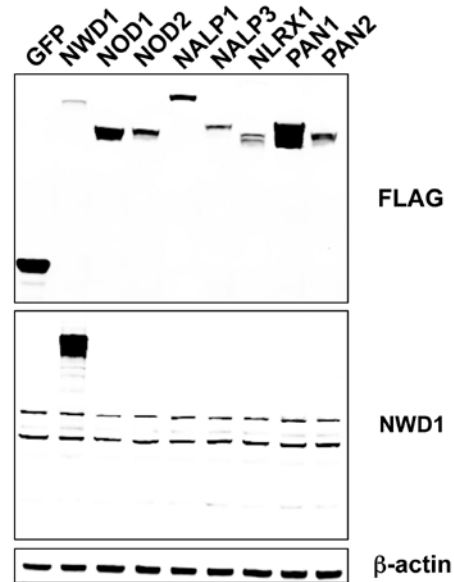

**Supplemental Figure 1. Specificity profile of anti-human NWD1 antibody.** HEK 293T cells in 10-centimeter plates (90% cell confluency) were transfected by calcium phosphate with 20  $\mu$ g of a series of FLAG-tagged constructs (as indicated). At 48 hours post-transfection, cells were lysed and 24  $\mu$ g of protein lysate was resolved by SDS-PAGE. Immunoblotting analysis was performed using antibodies for FLAG, NWD1 (585) and  $\beta$ -actin (loading control).

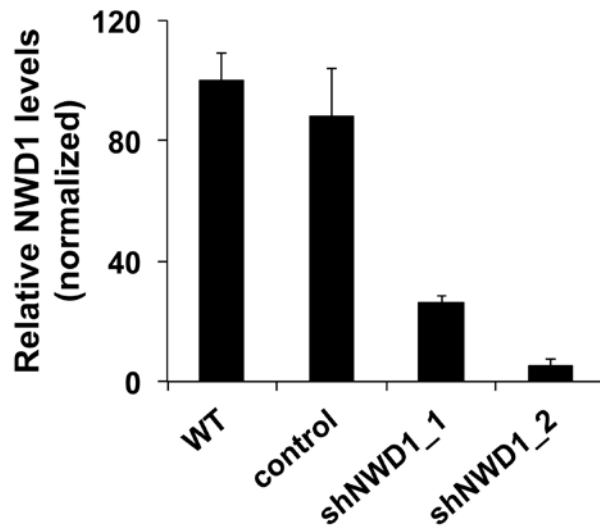

**Supplemental Figure 2. Validation of *NWD1* silencing by Real-Time PCR.**

Transduced PPC-1 cells constitutively expressing shRNAs against GFP (control) or *NWD1* (shNWD1\_1 and shNWD1\_2) were processed for isolation of total RNA and first-strand cDNA synthesis. Non-transduced wild-type (WT) cells were also processed as a control. RNA levels were normalized by cyclophilin (CPH) expression. Relative values (y-axis) were obtained by comparison to the expression in wild-type cells (mean value = 100). The values presented are averages of at least three replicates ( $\pm$  standard deviation).

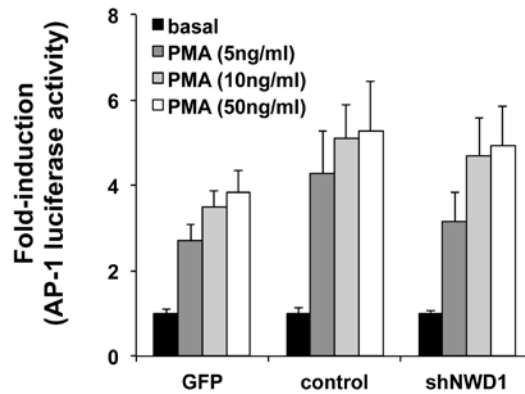

**Supplemental Figure 3. Activity towards AP-1 signaling pathway.** HEK 293T cells stably constitutively expressing GFP, shRNAs for GFP (control) or NWD1 (shNWD1) were plated in 10-cm dish at same cell density and, at 80% confluency, were transfected by calcium phosphate with 18.5  $\mu$ g of AP-1 mediated firefly luciferase and 4  $\mu$ g thymidine kinase (TK)-mediated Renilla reporter plasmids. At 36 hours post-transfection, cells were resuspended and loaded into 96-well plate at  $10^5$  cells/well. Cells were further treated with different concentrations of Phorbol 12-myristate 13-acetate (PMA) for 20 hours. Luciferase activity was measured using Dual-Luciferase<sup>TM</sup> Reporter Assay System (Promega). Values were normalized according to Renilla luciferase signals. Values converted to fold-induction in AP-1-mediated activity according to the measurement obtained for respective non-treated (basal) cells (mean value=1). The values presented are averages of three replicates ( $\pm$  standard deviation).

| Top Networks |                                                                                                      |       |
|--------------|------------------------------------------------------------------------------------------------------|-------|
| ID           | Associated Network Functions                                                                         | Score |
| 1            | Lymphoid Tissue Structure and Development, Tissue Morphology, Cell-To-Cell Signaling and Interaction | 44    |
| 2            | Cancer, Cell Death, Neurological Disease                                                             | 42    |
| 3            | Cancer, Cell-To-Cell Signaling and Interaction, Gastrointestinal Disease                             | 35    |
| 4            | Gene Expression, Cell Morphology, Cellular Assembly and Organization                                 | 35    |
| 5            | Organ Development, Organ Morphology, Visual System Development and Function                          | 34    |

  

| Top Molecules            |        |                            |         |
|--------------------------|--------|----------------------------|---------|
| Fold Change up-regulated |        | Fold Change down-regulated |         |
| ITGB1*                   | ↑2.496 | RPPH1 (includes EG:85495)  | ↓-4.005 |
| ACTG1*                   | ↑2.315 | MT2A                       | ↓-3.675 |
| PLAU                     | ↑2.142 | BCYRN1                     | ↓-3.374 |
| SC4MOL                   | ↑2.135 | MT1A                       | ↓-3.207 |
| PSMC4*                   | ↑2.122 | CLDN10                     | ↓-2.391 |
| CTNNB1                   | ↑2.092 | SLPI                       | ↓-2.390 |
| SLC3A2*                  | ↑2.091 | HIST2H2AA3*                | ↓-2.306 |
| XPOT                     | ↑2.061 | SEPW1                      | ↓-2.234 |
| TCEA1                    | ↑2.059 | CATSPER2                   | ↓-2.211 |
| GNG12                    | ↑1.954 | C4BFB                      | ↓-2.184 |

**Supplemental Figure 4. Networks and molecules involved in *NWD1* signaling.**

Comparative gene expression microarray data was analyzed systematically by Ingenuity Pathway Analysis (IPA) to identify potential interaction networks based on *NWD1* regulated genes. The biological functions of the highest scoring networks correlated with *NWD1* expression are shown on the top panel. Genes whose expression was altered after *NWD1* knockdown in PPC-1 cells ( $\geq$  2-fold change) are shown on the bottom panel.



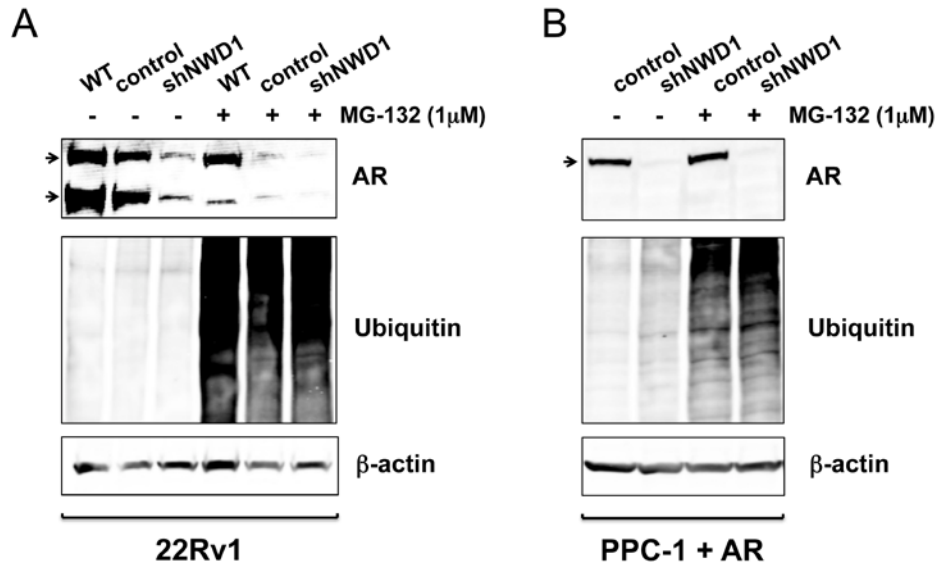

**Supplemental Figure 6. MG132 does not restore AR levels in NWD1-depleted PCa cells.** (A) Wild-type (WT) or transduced 22Rv1 cells, stably expressing shGFP (control) or shNWD1, were cultured in charcoal-stripped serum containing medium (6-well dish, 90% confluency) for 48 hours and further treated with (+) or without (-) 1  $\mu$ M MG-132 for 26 hours. (B) PPC-1 cells in 6-well dish (80% confluency) were transfected by Fugene HD<sup>TM</sup> (Roche) with 2.2  $\mu$ g of shGFP (control) or shNWD1 constructs plus 1.1  $\mu$ g of CMV-mediated AR expression vector (3.3  $\mu$ g DNA per well). At 12 hours post-transfection, cells were cultured in charcoal-stripped serum containing medium for 48 hours and further treated with (+) or without (-) 1  $\mu$ M MG-132 for 26 hours. Total cell lysates were isolated and analyzed (50  $\mu$ g protein) by immunoblotting using antibodies specific for AR, ubiquitin and  $\beta$ -actin (loading control). AR protein bands are indicated by arrows.

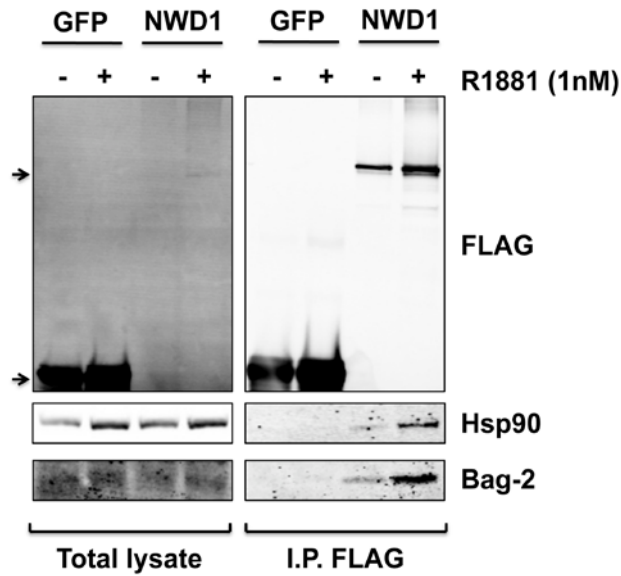

**Supplemental Figure 7. Validation of Hsp90 and Bag-2 as NWD1 interacting proteins.** LNCaP cells in T-75 flasks (70% confluency) were transfected by Fugene HD<sup>TM</sup> (Roche) with 11  $\mu$ g of FLAG-GFP (control) or FLAG-NWD1 expression constructs. At 48 hours post-transfection, cells were cultured in charcoal-stripped serum containing medium for further 48 hours and then treated with (+) or without (-) 1 nM R1881 for 30 hours. Total cell lysates (50  $\mu$ g protein, left panel) and FLAG immunoprecipitates (right panel) were analyzed by immunoblotting using antibodies specific for FLAG, Hsp90 and Bag-2. FLAG-tagged proteins, detected in the total lysates, are indicated (arrows).
